# Supplementary material for: CoO/Co-graphene quantum dots as an oxidative mimetic nanozyme for the colorimetric detection of l-cysteine
Source: Royal Society of Chemistry journal article supplement (doi:10.1039/d4ay00086b), 2024-01-01
Supplement: d4ay00086b1.pdf [file d4ay00086b1.pdf]

## Supplementary materials:

### CoO/Co-graphene quantum dot as oxidative mimetic nanozyme for the colorimetric detection of L-Cysteine

Dan Xu,<sup>\*a</sup> Qingbo Tu,<sup>a</sup> Xin San,<sup>a</sup> Anhong Zhu,<sup>a</sup> and Xinru Li<sup>a</sup>

<sup>a</sup> Department of Pharmacy, Nanjing University of Chinese Medicine Hanlin College, Taizhou, 225300, China

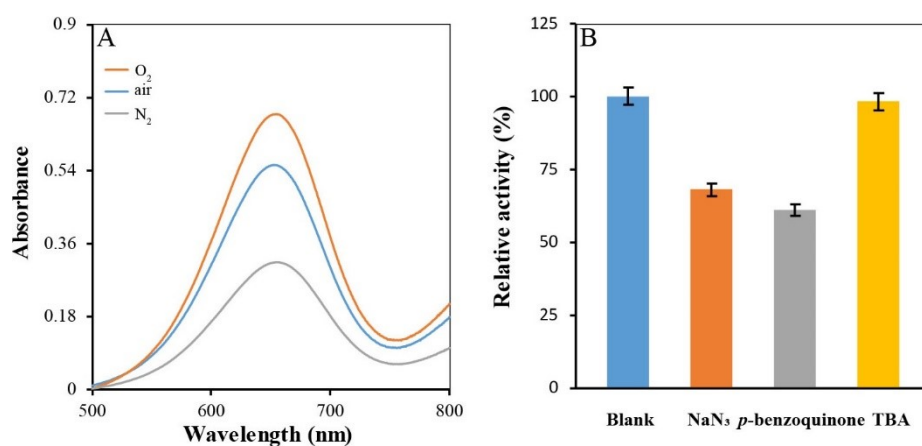

**Fig. S1** A: UV-vis absorption spectra of CoO/Co-Try-GQD + TMB in O<sub>2</sub>, air and N<sub>2</sub> solutions. B: The relative activity of different scavengers on the CoO/Co-Try-GQD + TMB system.

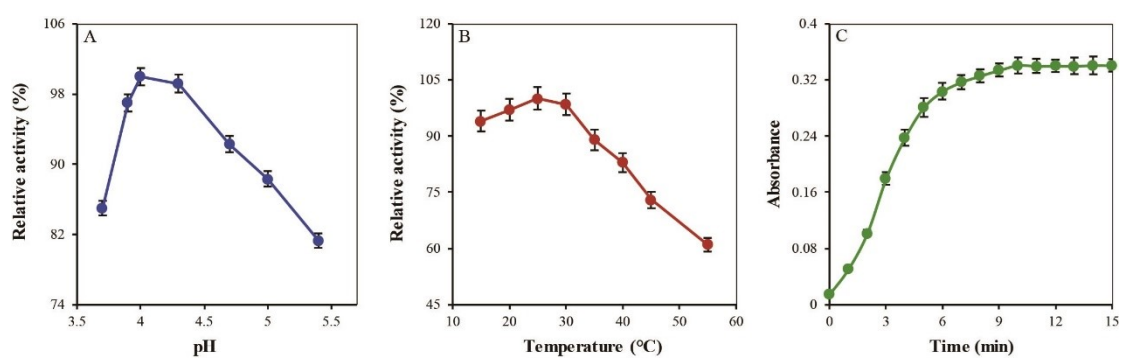

**Fig. s2** Effect of pH (A), temperature (B) and reaction time (C) on catalytic activity.

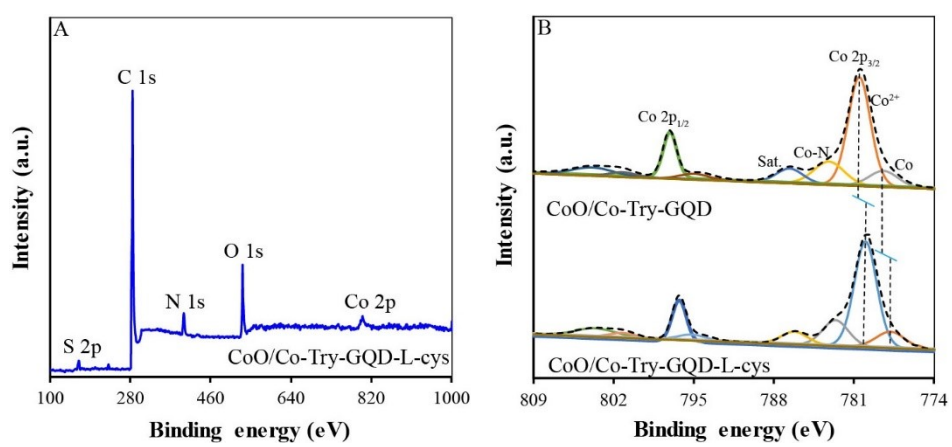

**Fig. s3** The total (A) and Co 2p (B) XPS spectra of CoO/Co-Try-GQD before and after interaction with L-cys.

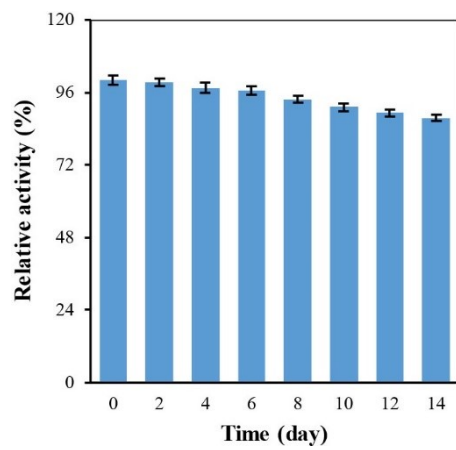

**Fig. s4** Stability of CoO/Co-Try-GQD in buffer.

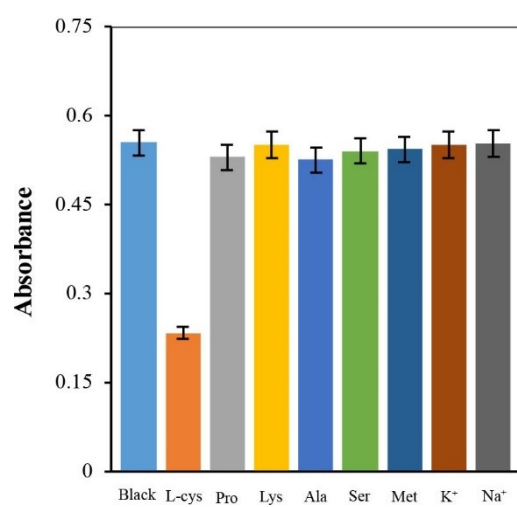

**Fig. S5** The  $A_{652}$  values of reaction system added with 2  $\mu\text{M}$  L-cys, 10  $\mu\text{M}$  amino acids (Pro, Lys, Ala, Ser, Met) and ions ( $\text{K}^+$ ,  $\text{Na}^+$ ), respectively.
